# Supplementary material for: Leiomodin-3-deficient mice display nemaline myopathy with fast-myofiber atrophy
Source: Dis Model Mech. 2015 Jun 1;8(6):635–41. doi: 10.1242/dmm.019430 (PMC4457035; doi:10.1242/dmm.019430)

## Supplementary Materials

**Figure S1.** Lmod2 expression is comparable between *Lmod3<sup>PB/PB</sup>* mice and *Lmod3<sup>+/+</sup>* mice.

Western blotting of 5-week-old mouse TA muscles stained with antibodies against Lmod2 and  $\beta$ -Tubulin (as loading control).

**Figure S2.** Disruption of Lmod3 expression causes growth retardation in *Lmod3<sup>PB/PB</sup>* female mice. Growth curves of female *Lmod3<sup>+/+</sup>* mice (n=6), *Lmod3<sup>PB/+</sup>* mice (n=13) and *Lmod3<sup>PB/PB</sup>* mice (n=11) are presented. ^, # or \* indicates  $P < 0.05$ ; ^^, ## or \*\* indicates  $P < 0.01$ ; ### or \*\*\* indicates  $P < 0.001$ .

**Figure S3.** Atrophic and internally nucleated fibers in *Lmod3<sup>PB/PB</sup>* muscles. Cross sections of different muscles from 4-week-old *Lmod3<sup>PB/+</sup>* and *Lmod3<sup>PB/PB</sup>* mice were stained by H&E. Scale bar: 50  $\mu$ m. Yellow arrows: atrophic fibers with internalized nuclei.

**Figure S4.** Internally nucleated fibers in *Lmod3<sup>PB/PB</sup>* muscles are not regenerative. (A-E) Cross sections of 4-week-old TA muscles from *Lmod3<sup>PB/PB</sup>* mice stained with antibodies indicated. Scale bar: 200  $\mu$ m. Yellow arrows: atrophic type IIb fibers with internalized nuclei. (F) Percentage of internal nucleated fibers in 4-week-old TA muscles from *Lmod3<sup>PB/+</sup>* and *Lmod3<sup>PB/PB</sup>* mice.

**Figure S5.** Modified Gomori trichrome staining on different muscles from *Lmod3<sup>PB/PB</sup>* mice.

White arrow: nemaline bodies. Scale bar: 50  $\mu$ m.

**Figure S6.** Disorganized Z-line and nemaline bodies in *Lmod3*<sup>PB/PB</sup> TA muscles. Electron microscopy images of TA muscles from 4-week-old *Lmod3*<sup>PB/+</sup> (A) and *Lmod3*<sup>PB/PB</sup> mice (B-D). Scale bar: 1  $\mu$ m. Yellow arrow: Z-line streaming. Red arrowhead: nemaline body.

**Figure S7.** Disruption of *Lmod3* causes atrophy specific to fast myofibers in soleus muscle. (A-F) Cross sections of 4-week-old soleus muscles from *Lmod3*<sup>PB/+</sup> and *Lmod3*<sup>PB/PB</sup> mice stained with antibodies indicated. Scale bar: 200  $\mu$ m. (G-I) Size distribution of CSA of type IIB (G), type I (H) and type IIA (I) myofibers in soleus muscles from 4-week-old *Lmod3*<sup>PB/+</sup> and *Lmod3*<sup>PB/PB</sup> mice. (G) and (I) show  $P < 0.001$  in Kolmogorov–Smirnov test. (V) Relative ratio between number of myofibers of a specific fiber type to number of total myofibers in soleus muscles from *Lmod3*<sup>PB/+</sup> and *Lmod3*<sup>PB/PB</sup> mice (N=3).

**Figure S8.** Disruption of *Lmod3* causes atrophy specific to fast myofibers in quadriceps muscle. (A-F) Cross sections of 4-week-old quadriceps muscles from *Lmod3*<sup>PB/+</sup> and *Lmod3*<sup>PB/PB</sup> mice stained with antibodies indicated. Scale bar: 200  $\mu$ m. (G-I) Size distribution of CSA of type IIB (G), type I (H) and type IIA (I) myofibers in quadriceps muscles from 4-week-old *Lmod3*<sup>PB/+</sup> and *Lmod3*<sup>PB/PB</sup> mice. (G-I) show  $P < 0.001$  in Kolmogorov–Smirnov test. (V) Relative ratio between number of myofibers of a specific fiber type to number of total myofibers in quadriceps muscles from *Lmod3*<sup>PB/+</sup> and *Lmod3*<sup>PB/PB</sup> mice (N=3). \* $P < 0.05$ .

## Figure S1

**A**

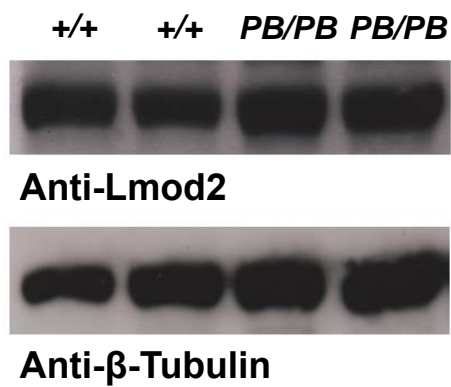

## Figure S2

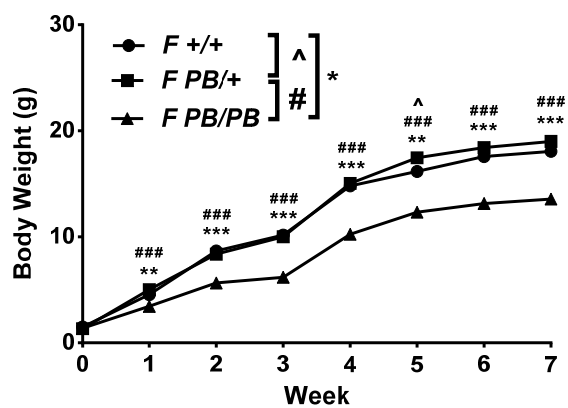

Figure S3

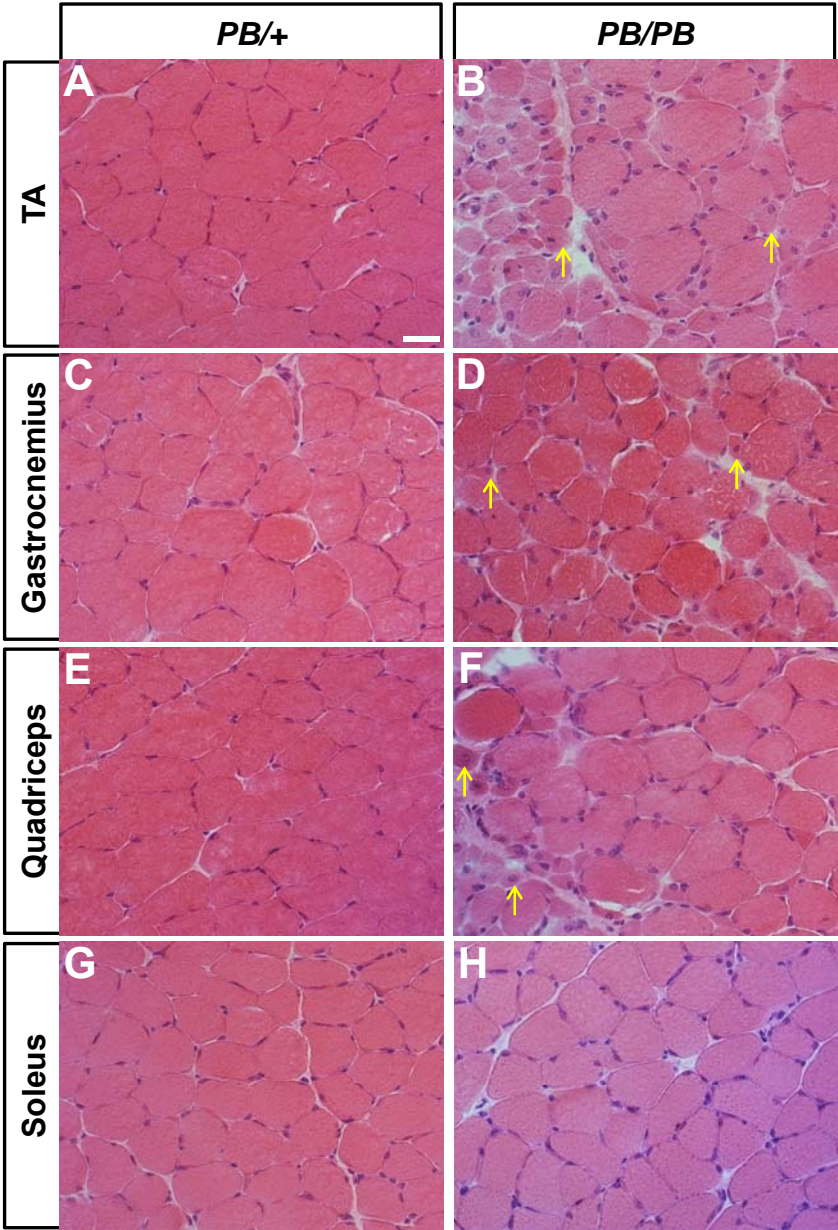

Figure S4

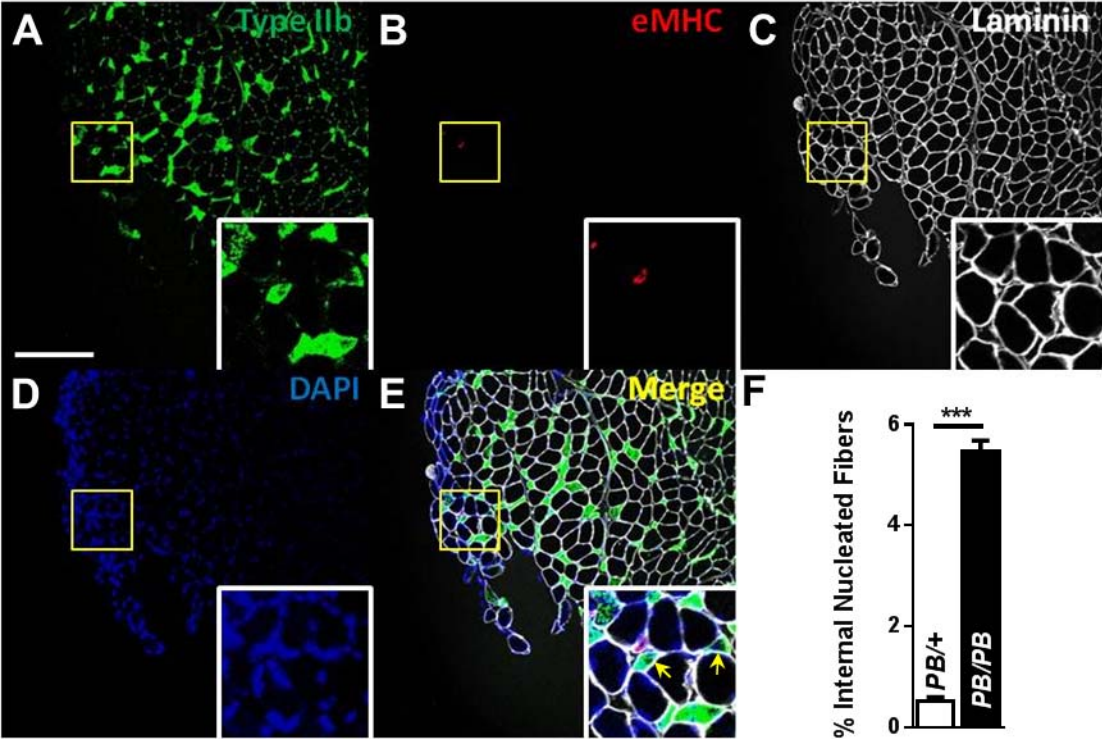

**Figure S5**

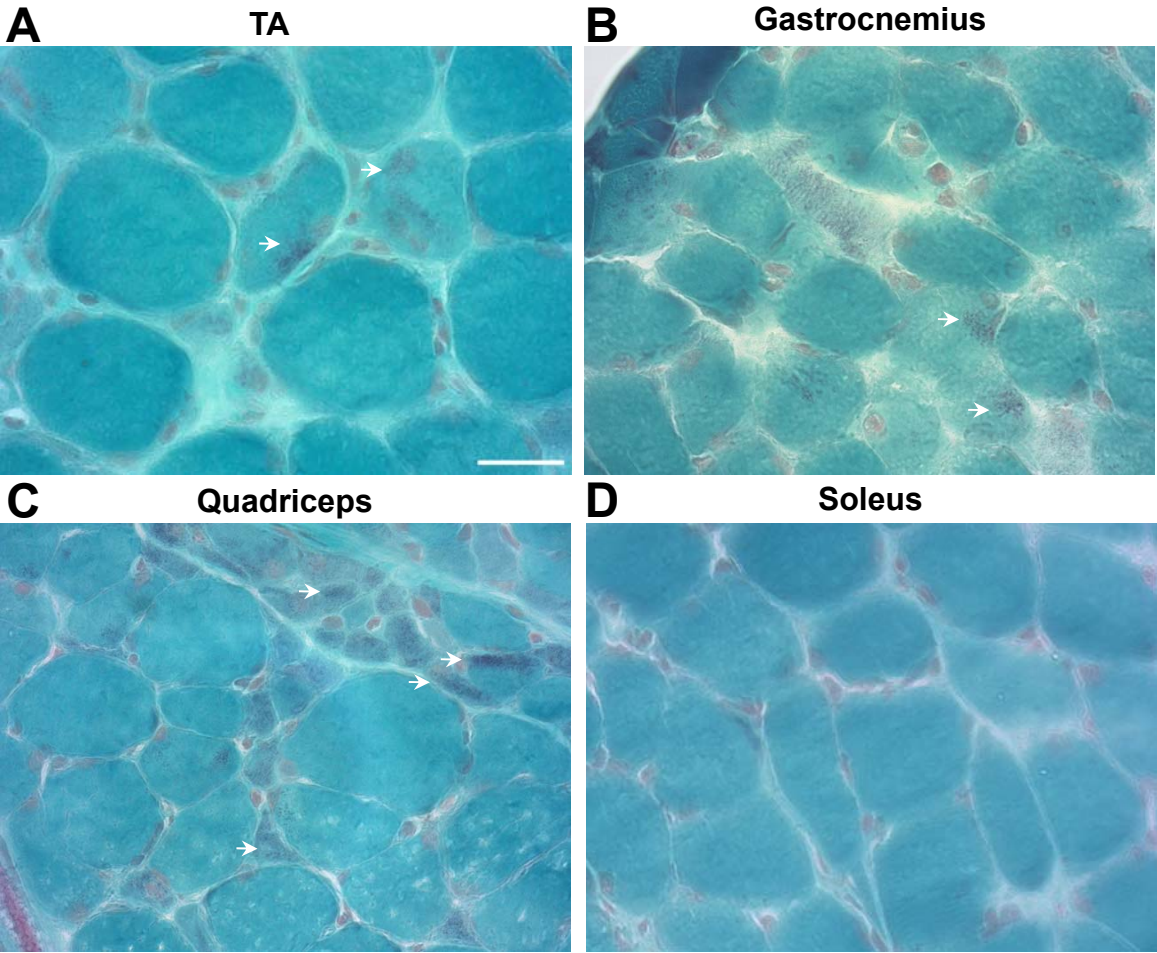

Figure S6

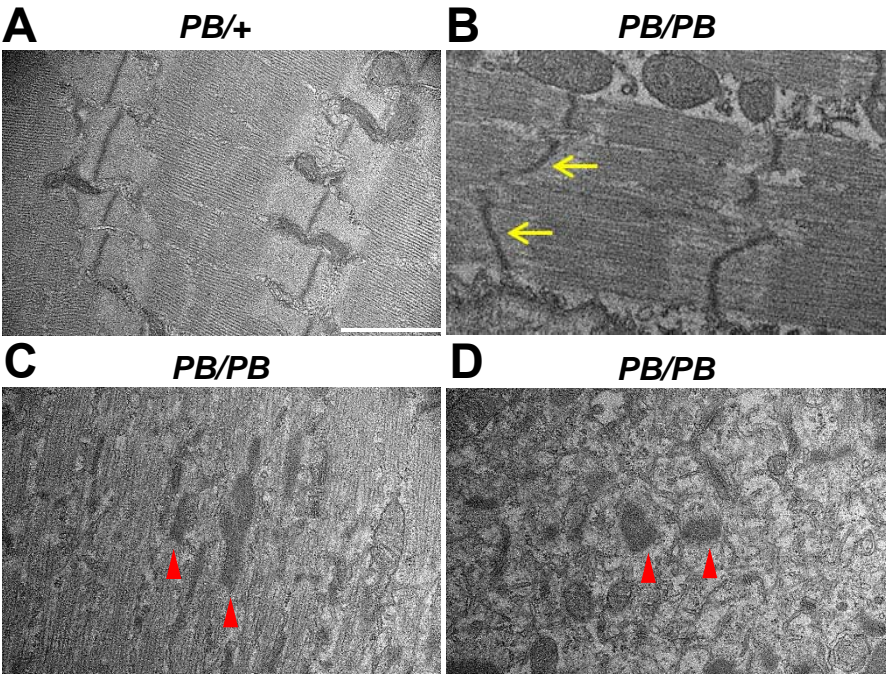

Figure S7

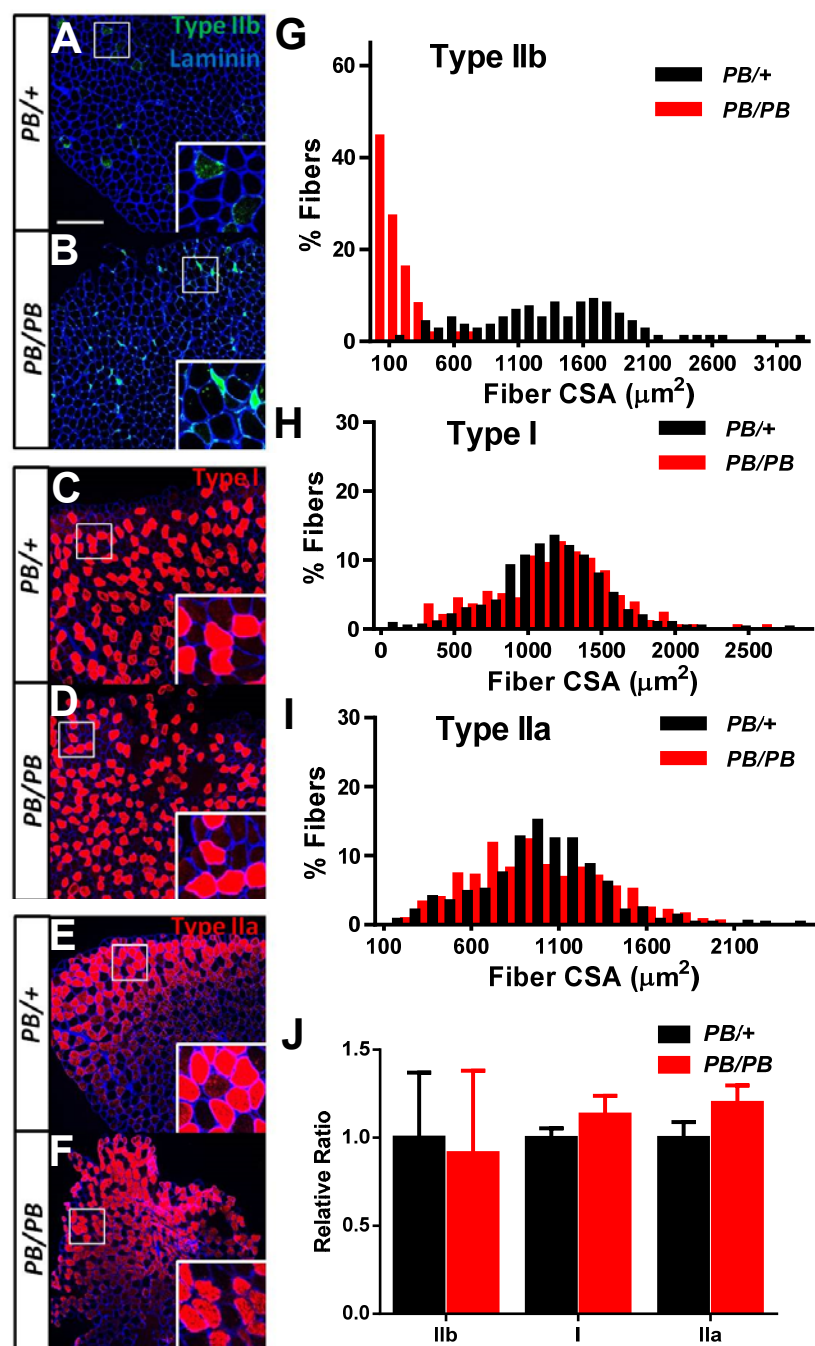

Figure S8

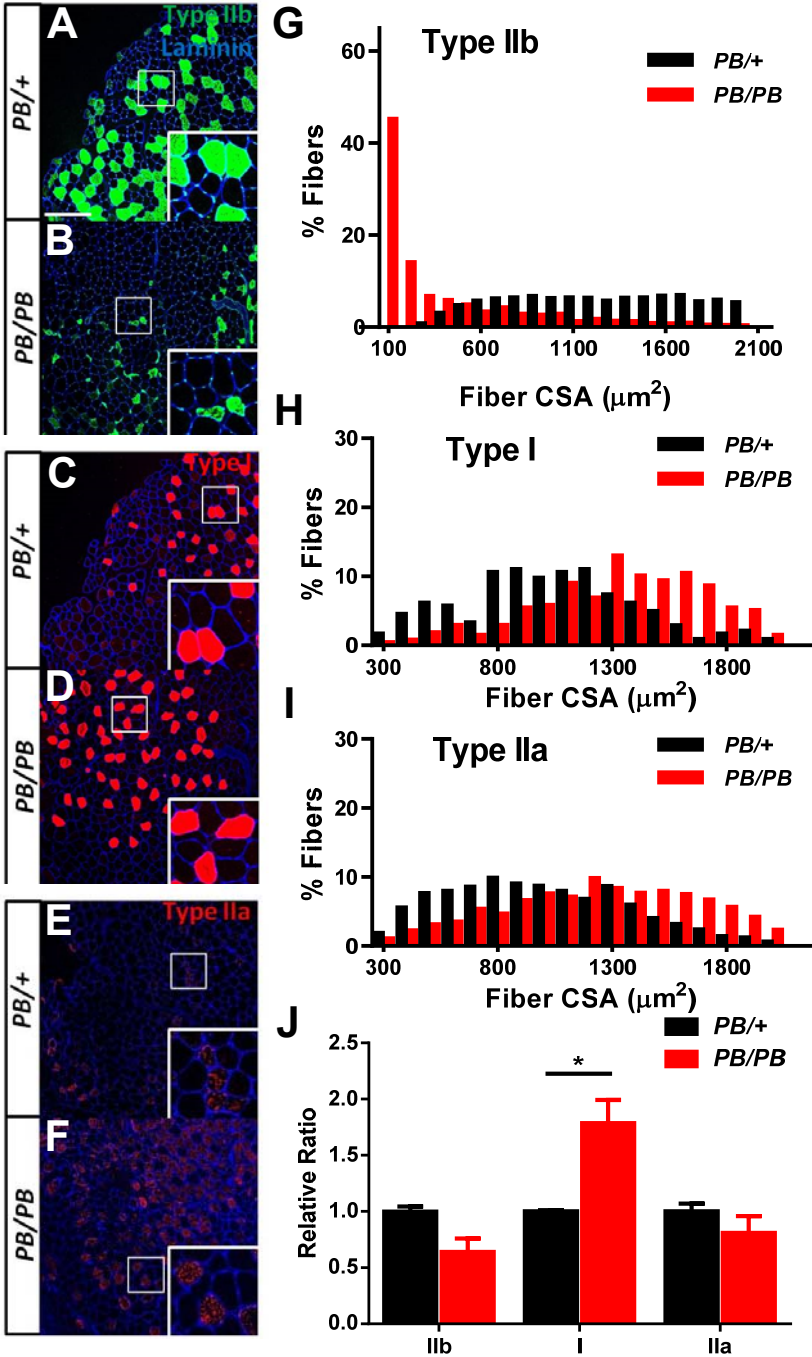

Supplement: Supplementary Material [file supp_8.6.635_DMM019430.pdf]
